# Supplementary material
Source: Springer Nature journal article supplement (https://www.springermedizin.de/resource/supplementary/13034_2010_135_MOESM3_ESM.pdf/9652462)
Supplement: MOESM3 [file 9652462]

121 Referrals

77 Excluded  
**Reasons for exclusion**  
60 too mild  
17 social phobia not main problem

44 Randomized

21 Allocated to CBT with focus on cognition  
♦

23 Allocated to Wait  
♦

15 completed Treatment  
6 dropped out  
**Reasons for drop outs**  
1 Quick initial success  
2 Time burden on the family  
3 Family misfortunes such as unemployment, parental separation or a parent's depression

21 completed Wait  
**Reasons for drop out:**  
2 Time burden on the family

15 Assessed  
0 Declined

21 Assessed  
0 Declined
